# Supplementary material
Source: MDPI journal article supplement (https://www.mdpi.com/2077-0472/11/5/400)

**Figure S1.** PCR detection of citrus yellow vein clearing virus (A) and citrus tatter leaf virus (B) RNAs isolated from sour orange (lanes 1, 2) and *P. trifoliata* (lane 3). Positive (+) and negative (-) controls have been added. M1: 100-bp molecular ladder, M2: 1Kb plus molecular ladder (Invitrogen).

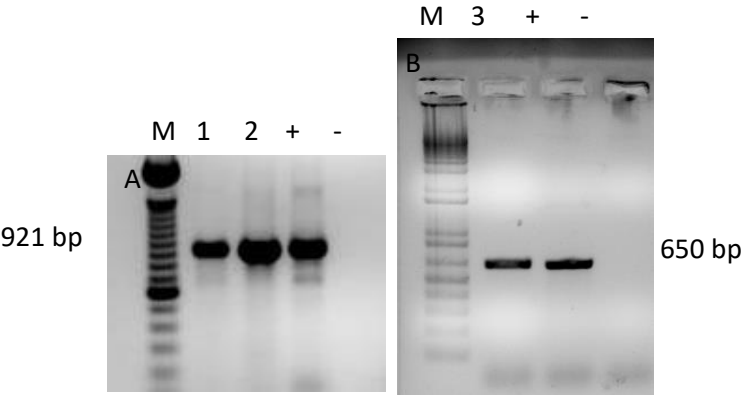

Supplement: s1 [file s1 › agriculture-1177985-supplementary.pdf]
